## Intraoperative Mechanical Ventilation and Postoperative Pulmonary Complications after Cardiac Surgery: Erratum

In the November 2019 issue, there was an error in the Abstract of article “Intraoperative Mechanical Ventilation and Postoperative Pulmonary Complications after Cardiac Surgery” (Mathis MR, Duggal NM, Likosky DS, Haft JW, Douville NJ, Vaughn MT, Maile MD, Blank RS, Colquhoun DA, Strobel RJ, Janda AM, Zhang M, Kheterpal S, Engoren MC: *ANESTHESIOLOGY* 2019; 131:1046–62. doi: 10.1097/ALN.0000000000002909). In the sentence “The authors identified an intraoperative lung-protective ventilation bundle as independently associated with pulmonary complications after cardiac surgery,” an association was noted between lung-protective ventilation bundle and pulmonary complications but the authors wish to specify the direction of the association (negative). The corrected sentence should read: “The authors identified an intraoperative lung-protective ventilation bundle as independently associated with reduced pulmonary complications after cardiac surgery.”

The authors regret the error. The online version and PDF of the article have been corrected.

DOI: 10.1097/ALN.0000000000003038

## Reference

Mathis MR, Duggal NM, Likosky DS, Haft JW, Douville NJ, Vaughn MT, Maile MD, Blank RS, Colquhoun DA, Strobel RJ, Janda AM, Zhang M, Kheterpal S, Engoren MC: Intraoperative Mechanical Ventilation and Postoperative Pulmonary Complications after Cardiac Surgery. *ANESTHESIOLOGY* 2019; 131:1046–62. doi: 10.1097/ALN.0000000000002909.
